# Supplementary material
Source: PubMed Central journal article supplement (PMC6111519)
Supplement: JSLHR-60-3378-s003.pdf [file JSLHR-60-3378-s003.pdf]

**Supplemental Material S3.** Criteria for preprocessing speech samples for envelope modulation spectrum (EMS) analyses using Adobe Soundbooth.

1. Listen to each sample and identify noise that is unrelated to participant speech. Some examples may include (a) door opening/closing, (b) participant tapping on desk/table, (c) cell phone ringing, or (d) coughing/sneezing. Remove these from the sample by highlighting the noise on the spectrogram. Select "Remove."
2. Identify portions of the sample when the clinician/experimenter is speaking. If this occurs while the participant is also speaking, remove the entire utterance. Like the above procedure, highlight the beginning/end of this portion of the speech sample and select "Remove."
3. To remove sample noise, first capture the "noise print." Then remove noise based on "captured noise print."
