# Supplementary material
Source: PubMed Central journal article supplement (PMC6111519)
Supplement: JSLHR-60-3378-s004.pdf [file JSLHR-60-3378-s004.pdf]

## Supplemental Material S4. Correlation coefficients for each predictor variable by group.

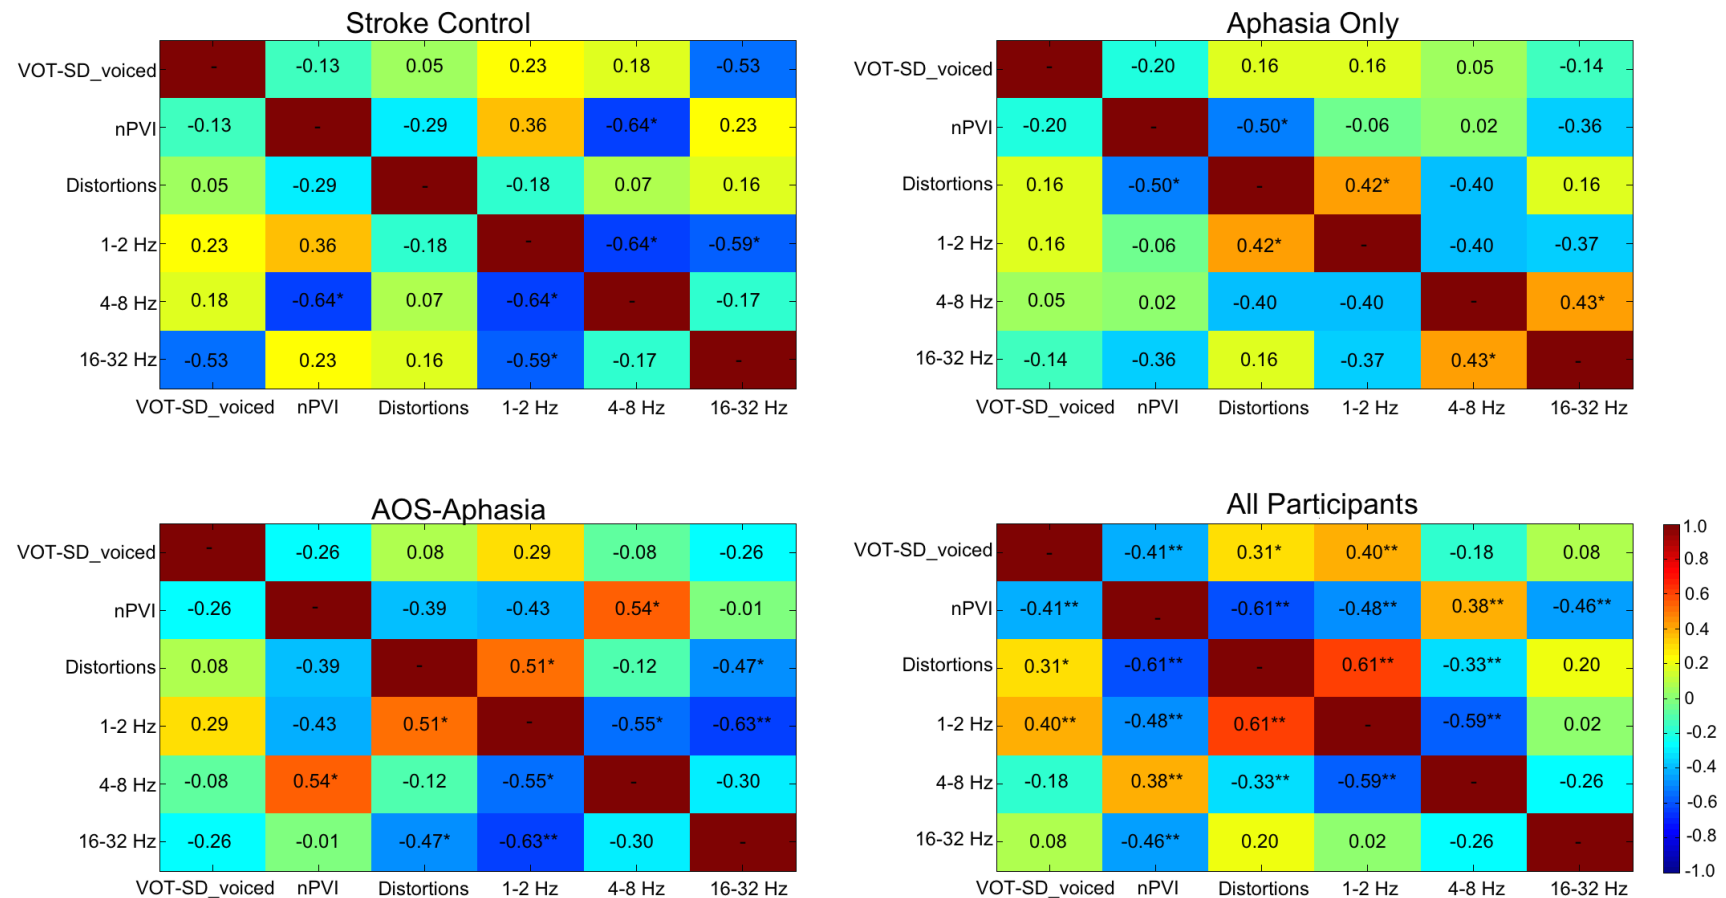

**Figure S2.** Warmer colors indicate positive correlations; cooler colors indicate negative correlations. Significant correlations (at  $p < .05$ ) are indicated by one asterisk (\*); correlations significant when Bonferroni corrected ( $p < .01$ ) are indicated by two asterisks (\*\*). AOS = apraxia of speech; nPVI-V = normalized Pairwise Variability Index–Vowels; VOT-SD = standard deviation of voice onset time.
