# Supplementary material
Source: PubMed Central journal article supplement (PMC6111519)
Supplement: JSLHR-60-3378-s005.pdf [file JSLHR-60-3378-s005.pdf]

**Supplemental Material S5.**

**Table S1.** Correlations between predictor variables and ASRS scores for the AOS-Aphasia group only.

| ASRS item                                                                                     | 1–2 Hz | 4–8 Hz  | 16–32 Hz | VOT-SD–<br>Voiced | nPVI-V | Distortion<br>errors |
|-----------------------------------------------------------------------------------------------|--------|---------|----------|-------------------|--------|----------------------|
| 1.1 Distorted sound substitutions                                                             | .338   | –.481*  | .03      | .065              | –.277  | .538*                |
| 1.2 Distorted sound additions                                                                 | .1     | –.086   | –.006    | –.153             | –.204  | .371                 |
| 1.3 Increased sound distortions or distorted sound substitutions with increased complexity    | .395   | –.325   | –.121    | .294              | –.235  | .435                 |
| 1.4 Increased sound distortions or distorted sound substitutions with increased rate          | .265   | –.265   | .039     | .205              | –.484* | .423                 |
| 1.5 Inaccurate AMRs                                                                           | .056   | –.198   | .182     | –.214             | .094   | –.102                |
| 1.6 Reduced words per breath group relative to maximum vowel duration                         | .505*  | –.441   | –.196    | –.047             | –.33   | .541*                |
| 2.1 Syllable segmentation within words >1 syllable                                            | .553*  | –.529*  | –.264    | .025              | –.276  | .652**               |
| 2.2 Syllable segmentation across words in phrases/sentences                                   | .639** | –.496*  | –.388    | .008              | –.444  | .676**               |
| 2.3 Sound distortions                                                                         | .467*  | –.536*  | –.07     | .153              | –.362  | .622**               |
| 2.4 Slow overall speech rate                                                                  | .564*  | –.755** | –.022    | .047              | –.419  | .402                 |
| 2.5 Lengthened vowel and/or consonant segments                                                | .506*  | –.619*  | –.094    | .02               | –.256  | .414                 |
| 2.6 Lengthened intersegment durations                                                         | .394   | –.373   | –.036    | –.247             | –.255  | .4                   |
| 3.1 Deliberate, slowly sequenced segmented, and/or distorted SMRs compared AMRs               | .143   | –.181   | –.004    | –.186             | –.057  | –.165                |
| 3.2 Audible/visible articulatory groping; speech initiation difficulty; false starts/restarts | .496*  | –.452*  | –.094    | –.134             | –.127  | .194                 |
| 4.1 Sound or syllable repetitions                                                             | .018   | –.131   | .205     | –.016             | –.227  | –.025                |

Note. ASRS scores from Strand, Duffy, Clark, and Josephs (2014). ASRS = Apraxia of Speech Rating Scale; AOS = apraxia of speech; nPVI-V = normalized Pairwise Variability Index–Vowels; VOT-SD = standard deviation of voice onset time; AMRs = alternating movement rates; SMR = sequential motion rates.

\*Significant at  $p < .05$ . \*\*Significant at  $p < .01$ . Correlations for Item 4.2 unavailable due to few participants with ratings for that item.

**Reference**

Strand, E. A., Duffy, J. R., Clark, H. M., & Josephs, K. (2014). The apraxia of speech rating scale: a tool for diagnosis and description of apraxia of speech. *Journal of Communication Disorders*, 51, 43-50. doi:10.1016/j.jcomdis.2014.06.008
