# Supplementary material
Source: PubMed Central journal article supplement (PMC6111519)
Supplement: JSLHR-60-3378-s006.pdf [file JSLHR-60-3378-s006.pdf]

### Supplemental Material S6. LDA results with aphasia severity included.

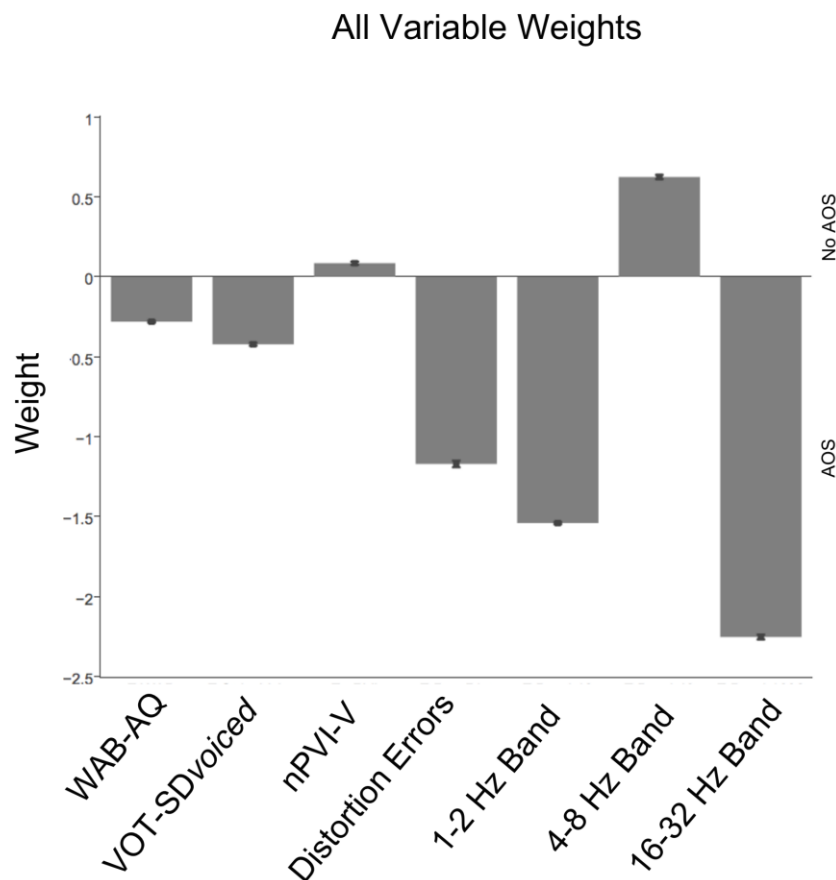

**Figure S3.** This figure presents results from the linear discriminant analysis (LDA) when aphasia severity (WAB-AQ) was included as a predictor. Note that the WAB-AQ variable had the lowest prediction weight, and inclusion of WAB-AQ scores did not change prediction accuracy, meaning classification results are not influenced by aphasia severity. AOS = apraxia of speech; nPVI-V = normalized Pairwise Variability Index–Vowels; VOT-SD = standard deviation of voice onset time; WAB-AQ = Western Aphasia Battery Aphasia Quotient (Kertesz, 2006).

#### Reference

Kertesz, A. (2006). *Western Aphasia Battery–Revised*. San Antonio, TX: Pearson.
